# Supplementary material for: Ribovirus classification by a polymerase barcode sequence
Source: PeerJ. 2022 Oct 13;10:e14055. doi: 10.7717/peerj.14055 (PMC9573346; doi:10.7717/peerj.14055)
Supplement: Supplemental Information 2 — SRA accessions, reference sequences and identities obtained using Rubella palmprint as a query. [file peerj-10-14055-s002.xlsx]

## Sheet: palmID_rubella_SRA_metadata
Supplementary Table 1: palmID search for Rubella virus RdRP
run_id	palm_id	sOTU	nickname	virus	coverage	qseqid	pident	evalue	biosample_id	release_date	scientific_name	sra_sequence
ERR3178588	u1669	u6346	skinnyVaisya	rubella	5.74	NP_062883.2	99	6.8e-69	SAMEA5365585	2019-05-24	viral metagenome	IEVDFTEFDMNQTLATRDVELEISAALLGLPCAEDYRALRAGSYCTLRELGITETGCERTSGEPATLLHNTTVAMCMAMRMVPKGVRWAGIFQGDDMVI
SRR3927076	u324	u6346	skinnyVaisya	rubella	3.89	NP_062883.2	99	6.8e-69	SAMN05362795	2016-07-16	human eye metagenome	IEVDFTEFDMNQTLATRDVELEISAALLGLPCAEDYRALRAGSYCTLRELGSTETGCERTSGEPATLLHNTTVAMCMAMRMVPKGVRWAGIFQGDDMVI
SRR7992310	u324	u6346	skinnyVaisya	rubella	44.9	NP_062883.2	99	6.8e-69	SAMN10173390	2018-10-10	human skin metagenome	IEVDFTEFDMNQTLATRDVELEISAALLGLPCAEDYRALRAGSYCTLRELGSTETGCERTSGEPATLLHNTTVAMCMAMRMVPKGVRWAGIFQGDDMVI
SRR2016702	u324	u6346	skinnyVaisya	rubella	265.71	NP_062883.2	99	6.8e-69	SAMN03653090	2015-05-12	Homo sapiens	IEVDFTEFDMNQTLATRDVELEISAALLGLPCAEDYRALRAGSYCTLRELGSTETGCERTSGEPATLLHNTTVAMCMAMRMVPKGVRWAGIFQGDDMVI
SRR2016701	u324	u6346	skinnyVaisya	rubella	261.63	NP_062883.2	99	6.8e-69	SAMN03653090	2015-05-12	Homo sapiens	IEVDFTEFDMNQTLATRDVELEISAALLGLPCAEDYRALRAGSYCTLRELGSTETGCERTSGEPATLLHNTTVAMCMAMRMVPKGVRWAGIFQGDDMVI
SRR2016704	u324	u6346	skinnyVaisya	rubella	230.06	NP_062883.2	99	6.8e-69	SAMN03653090	2015-05-12	Homo sapiens	IEVDFTEFDMNQTLATRDVELEISAALLGLPCAEDYRALRAGSYCTLRELGSTETGCERTSGEPATLLHNTTVAMCMAMRMVPKGVRWAGIFQGDDMVI
SRR7992309	u324	u6346	skinnyVaisya	rubella	42.68	NP_062883.2	99	6.8e-69	SAMN10173390	2018-10-10	human skin metagenome	IEVDFTEFDMNQTLATRDVELEISAALLGLPCAEDYRALRAGSYCTLRELGSTETGCERTSGEPATLLHNTTVAMCMAMRMVPKGVRWAGIFQGDDMVI
SRR2016712	u324	u6346	skinnyVaisya	rubella	228.89	NP_062883.2	99	6.8e-69	SAMN03653090	2015-05-12	Homo sapiens	IEVDFTEFDMNQTLATRDVELEISAALLGLPCAEDYRALRAGSYCTLRELGSTETGCERTSGEPATLLHNTTVAMCMAMRMVPKGVRWAGIFQGDDMVI
SRR2016743	u324	u6346	skinnyVaisya	rubella	20.87	NP_062883.2	99	6.8e-69	SAMN03653091	2015-05-12	Homo sapiens	IEVDFTEFDMNQTLATRDVELEISAALLGLPCAEDYRALRAGSYCTLRELGSTETGCERTSGEPATLLHNTTVAMCMAMRMVPKGVRWAGIFQGDDMVI
SRR2016808	u324	u6346	skinnyVaisya	rubella	6.68	NP_062883.2	99	6.8e-69	SAMN03653091	2015-05-12	Homo sapiens	IEVDFTEFDMNQTLATRDVELEISAALLGLPCAEDYRALRAGSYCTLRELGSTETGCERTSGEPATLLHNTTVAMCMAMRMVPKGVRWAGIFQGDDMVI
SRR2016810	u324	u6346	skinnyVaisya	rubella	13.69	NP_062883.2	99	6.8e-69	SAMN03653091	2015-05-13	Homo sapiens	IEVDFTEFDMNQTLATRDVELEISAALLGLPCAEDYRALRAGSYCTLRELGSTETGCERTSGEPATLLHNTTVAMCMAMRMVPKGVRWAGIFQGDDMVI
SRR2016711	u324	u6346	skinnyVaisya	rubella	233.06	NP_062883.2	99	6.8e-69	SAMN03653090	2015-05-12	Homo sapiens	IEVDFTEFDMNQTLATRDVELEISAALLGLPCAEDYRALRAGSYCTLRELGSTETGCERTSGEPATLLHNTTVAMCMAMRMVPKGVRWAGIFQGDDMVI
SRR2016812	u324	u6346	skinnyVaisya	rubella	13.98	NP_062883.2	99	6.8e-69	SAMN03653091	2015-05-12	Homo sapiens	IEVDFTEFDMNQTLATRDVELEISAALLGLPCAEDYRALRAGSYCTLRELGSTETGCERTSGEPATLLHNTTVAMCMAMRMVPKGVRWAGIFQGDDMVI
SRR2016706	u324	u6346	skinnyVaisya	rubella	223.38	NP_062883.2	99	6.8e-69	SAMN03653090	2015-05-12	Homo sapiens	IEVDFTEFDMNQTLATRDVELEISAALLGLPCAEDYRALRAGSYCTLRELGSTETGCERTSGEPATLLHNTTVAMCMAMRMVPKGVRWAGIFQGDDMVI
SRR2016807	u324	u6346	skinnyVaisya	rubella	5.5	NP_062883.2	99	6.8e-69	SAMN03653091	2015-05-12	Homo sapiens	IEVDFTEFDMNQTLATRDVELEISAALLGLPCAEDYRALRAGSYCTLRELGSTETGCERTSGEPATLLHNTTVAMCMAMRMVPKGVRWAGIFQGDDMVI
SRR2016741	u324	u6346	skinnyVaisya	rubella	19.86	NP_062883.2	99	6.8e-69	SAMN03653091	2015-05-12	Homo sapiens	IEVDFTEFDMNQTLATRDVELEISAALLGLPCAEDYRALRAGSYCTLRELGSTETGCERTSGEPATLLHNTTVAMCMAMRMVPKGVRWAGIFQGDDMVI
ERR3178683	u1669	u6346	skinnyVaisya	rubella	4.45	NP_062883.2	99	6.8e-69	SAMEA5365585	2019-05-24	viral metagenome	IEVDFTEFDMNQTLATRDVELEISAALLGLPCAEDYRALRAGSYCTLRELGITETGCERTSGEPATLLHNTTVAMCMAMRMVPKGVRWAGIFQGDDMVI
SRR2063967	u232099	u232099	askanceOak	ruche	12.29	NP_062883.2	83.8	9.7e-60	SAMN03761369	2015-08-29	bat metagenome	VEVDFSEFDMNQTLATRDVEIEVSASLLGLPSADDYRALRAGSYCLLRDVAATETGCERTSGEPATLLHNTLVGMCMAMRMVPKGVRWHGIFQGDDMVL
SRR9925288	u122831	u131679	purifyingProline	rumple	2.05	NP_062883.2	75.8	2.5e-53	SAMN12530416	2019-08-08	Plethodon cinereus	VEVDFTEFDRNQTLATRDLEVEVTSHLLGFDCLDDYKALRAGSYCQLRDLAQTETGCERTSGEPATLLHNTVVGMAMAMRMVPPGLPWAGIFQGDDMVL
SRR9925304	u131679	u131679	purifyingProline	rumple	3.91	NP_062883.2	75.8	2.5e-53	SAMN12530442	2019-08-08	Plethodon cinereus	VEVDFTEFDRNQTLATRDLEVEVTSHLLGFDCLDDYKALRAGSYCQLRDLAQTETGCERTSGEPATLLHNTIVGMAMAMRMVPPGLPWAGIFQGDDMVL
SRR9925260	u131679	u131679	purifyingProline	rumple	3.03	NP_062883.2	75.8	2.5e-53	SAMN12530409	2019-08-08	Plethodon cinereus	VEVDFTEFDRNQTLATRDLEVEVTSHLLGFDCLDDYKALRAGSYCQLRDLAQTETGCERTSGEPATLLHNTIVGMAMAMRMVPPGLPWAGIFQGDDMVL
SRR9925267	u122831	u131679	purifyingProline	rumple	2.19	NP_062883.2	75.8	2.5e-53	SAMN12530446	2019-08-08	Plethodon cinereus	VEVDFTEFDRNQTLATRDLEVEVTSHLLGFDCLDDYKALRAGSYCQLRDLAQTETGCERTSGEPATLLHNTVVGMAMAMRMVPPGLPWAGIFQGDDMVL
SRR5248938	u196907	u196907	etherealTeddy	ruffle	3.98	NP_062883.2	72.7	3.4e-51	SAMN06323810	2017-02-13	Amolops mantzorum	VEVDFTEFDRNQTLATRDLEVEVTSSILGFDNADDYKALRAGSYCQLRDIASTETGCERTSGEPATLLHNTVVGMAMAMRMVMSGAAWSGIFQGDDMVL
